# Supplementary material
Source: ML conference proceedings conference paper supplement (https://openreview.net/forum?id=zLAZhVIYpT)
Supplement: supplementary_material [file appendix.pdf › univeral_machine_sup/appendix.pdf]

## A Appendix

This is a supplementary document accompanying the main manuscript. Here we expand on some procedures and implementations used and provide additional results.

## B Methods

The information reward for acquiring feature  $i$  given observed features  $\mathbf{x}_o$  is:

$$R(i, \mathbf{x}_o) = \mathbb{E}_{\mathbf{z}_i \sim p(\mathbf{z}_i | \mathbf{x}_o)} D_{KL}[q(\mathbf{z} | \mathbf{x}_i, \mathbf{x}_o) \| q(\mathbf{z} | \mathbf{x}_o)] - \mathbb{E}_{\mathbf{z}_\phi, \mathbf{x}_i \sim p(\mathbf{x}_\phi, \mathbf{x}_i | \mathbf{x}_o)} D_{KL}[q(\mathbf{z} | \mathbf{x}_\phi, \mathbf{x}_i, \mathbf{x}_o) \| q(\mathbf{z} | \mathbf{x}_\phi, \mathbf{x}_o)] \quad (2)$$

- $\mathbf{x}_o$ : Currently observed features
- $\mathbf{x}_i$ : Candidate feature  $i$  to be acquired
- $\mathbf{x}_\phi$ : Target variables (labels)
- $q(\mathbf{z} | \cdot)$ : Posterior encoder distribution in VAE
- $p(\mathbf{x}_i | \mathbf{x}_o)$ : Conditional distribution of feature  $i$  given observed features
- $D_{KL}[\cdot \| \cdot]$ : Kullback-Leibler divergence The following algorithm describes our greedy procedure to select the next candidate from the set of unobserved features.

Algorithm 2: EDDI: Algorithm Overview

**Require:** Training dataset  $\mathbf{x}_{\text{trn}}$ , which is partially observed;  
Test dataset  $\mathbf{x}_{\text{tst}}$  without any observation; Indices  $\phi$  of target variables.

- 1: **TRAINING PHASE:**
- 2: Train Partial VAE by optimizing partial variational bound with  $\mathbf{x}_{\text{trn}}$
- 3: **INFERENCE PHASE (Active Feature Acquisition):**
- 4: **for** each test instance **do**
- 5:    $\mathbf{x}_O \leftarrow \emptyset$  ▷ no variable value has been observed for any test point
- 6:   **repeat**
- 7:     Choose variable  $x_i$  from  $U \setminus \phi$  to maximize the information reward (Equation (2))
- 8:      $\mathbf{x}_O \leftarrow x_i \cup \mathbf{x}_O$
- 9:   **until** Stopping criterion reached (e.g. the time budget)
- 10: **end for**

In this algorithm, we use a PartialVAE, but can also be replaced by any other encoder model. For example, hidden representations can be [CLS] token, or target representation token.

## C Open-World Active Feature Acquisition

## D Experiments

### D.1 Datasets

To enable effective pretraining of our universal neural inference model, we use OPENTABS - a comprehensive tabular dataset compiled from public sources including OpenML, UCI, Kaggle, and CATALOG. Following the collection of these datasets, we curate metadata for each of these datasets,

such as feature descriptions, dataset descriptions, and the range of classes for categorical datasets. We plan on open-sourcing this metadata on publication.

| Dataset Name     | ROC | Samples | Numerical | Categorical | Label Classes | Source                                                                                                                                                        |
|------------------|-----|---------|-----------|-------------|---------------|---------------------------------------------------------------------------------------------------------------------------------------------------------------|
| Breast           | C   | 699     | 9         | 0           | 2             | <a href="https://archive.ics.uci.edu/dataset/15/breast+cancer+wisconsin+original">https://archive.ics.uci.edu/dataset/15/breast+cancer+wisconsin+original</a> |
| Bone             | C   | 1479    | 2         | 7           | 3             | <a href="https://archive.ics.uci.edu/dataset/3/connectionist+bench+choice">https://archive.ics.uci.edu/dataset/3/connectionist+bench+choice</a>               |
| Diabetes         | C   | 768     | 8         | 0           | 2             | <a href="https://openml.org/d/37">https://openml.org/d/37</a>                                                                                                 |
| Vehicle          | C   | 846     | 18        | 0           | 4             | <a href="https://archive.ics.uci.edu/dataset/149/starlog+vehicle+silhouettes">https://archive.ics.uci.edu/dataset/149/starlog+vehicle+silhouettes</a>         |
| Satimage         | C   | 6430    | 36        | 0           | 6             | <a href="https://archive.ics.uci.edu/dataset/146/starlog+handsat+satellite">https://archive.ics.uci.edu/dataset/146/starlog+handsat+satellite</a>             |
| Sick             | C   | 3772    | 7         | 22          | 2             | <a href="http://archive.ics.uci.edu/dataset/102/thyroid+disease">http://archive.ics.uci.edu/dataset/102/thyroid+disease</a>                                   |
| Animaldata       | C   | 797     | 0         | 4           | 6             | <a href="https://pages.stern.nyu.edu/~simenof/AnimalData/Data/">https://pages.stern.nyu.edu/~simenof/AnimalData/Data/</a>                                     |
| Pcl              | C   | 1109    | 21        | 0           | 2             | <a href="https://openml.org/d/1068">https://openml.org/d/1068</a>                                                                                             |
| Adult            | C   | 48842   | 6         | 8           | 2             | <a href="https://archive.ics.uci.edu/dataset/2/adult">https://archive.ics.uci.edu/dataset/2/adult</a>                                                         |
| PhishingWebsites | C   | 11055   | 0         | 30          | 2             | <a href="https://archive.ics.uci.edu/dataset/327/phishing+websites">https://archive.ics.uci.edu/dataset/327/phishing+websites</a>                             |
| Cylinder-bands   | C   | 540     | 18        | 21          | 2             | <a href="https://archive.ics.uci.edu/dataset/32/cylinder+bands">https://archive.ics.uci.edu/dataset/32/cylinder+bands</a>                                     |
| MiceProtein      | C   | 1080    | 77        | 4           | 8             | <a href="https://archive.ics.uci.edu/dataset/342/mice+protein+expression">https://archive.ics.uci.edu/dataset/342/mice+protein+expression</a>                 |
| Car              | C   | 1728    | 0         | 6           | 4             | <a href="https://archive.ics.uci.edu/dataset/19/car+evaluation">https://archive.ics.uci.edu/dataset/19/car+evaluation</a>                                     |
| Segment          | C   | 2310    | 19        | 0           | 7             | <a href="https://archive.ics.uci.edu/dataset/50/image+segmentation">https://archive.ics.uci.edu/dataset/50/image+segmentation</a>                             |
| Porto-seguro     | R   | 2000    | 26        | 31          | 2             | <a href="https://openml.org/d/44787">https://openml.org/d/44787</a>                                                                                           |
| Amazon           | C   | 2000    | 0         | 9           | 2             | <a href="https://openml.org/d/44712">https://openml.org/d/44712</a>                                                                                           |
| Elevators        | R   | 16599   | 18        | 19          | -             | <a href="https://openml.org/d/216">https://openml.org/d/216</a>                                                                                               |
| Yprop            | R   | 8885    | 251       | 0           | -             | <a href="https://openml.org/d/416">https://openml.org/d/416</a>                                                                                               |
| Topo             | R   | 8885    | 266       | 267         | -             | <a href="https://openml.org/d/422">https://openml.org/d/422</a>                                                                                               |
| SAT11            | R   | 4400    | 115       | 1           | -             | <a href="https://www.cs.ucb.edu/~calbl/algorithms/Projects/SAT11/">https://www.cs.ucb.edu/~calbl/algorithms/Projects/SAT11/</a>                               |
| Diamonds         | R   | 53940   | 6         | 3           | -             | <a href="https://openml.org/d/42225">https://openml.org/d/42225</a>                                                                                           |
| House_sales      | R   | 21613   | 20        | 1           | -             | <a href="https://openml.org/d/42731">https://openml.org/d/42731</a>                                                                                           |

Table 4: Table of the downstream datasets in our experiments, along with different information

### D.2 Baselines

Here is the overview of the parameter count of our model and other baselines: ASPIRE Model size - 140, 165, 123 parameters CM2 Model size - 53, 784, 576. Our model is  $2.6 \times$  of CM2.

### D.3 Additional Results

| Dataset     | CM2 ↓        | ASPIRE ↓     | XGB ↓ | MLP ↓ |
|-------------|--------------|--------------|-------|-------|
| Elevators   | 0.292        | <b>0.098</b> | 0.340 | 0.360 |
| House Sales | <b>0.139</b> | 0.235        | 0.340 | 0.380 |
| Diamonds    | 0.971        | <b>0.020</b> | 0.203 | 0.344 |
| yprop       | 0.978        | <b>0.228</b> | 0.982 | 0.987 |
| topo        | 0.336        | <b>0.204</b> | 0.922 | 0.986 |
| Average     | 0.543        | <b>0.157</b> | 0.557 | 0.611 |

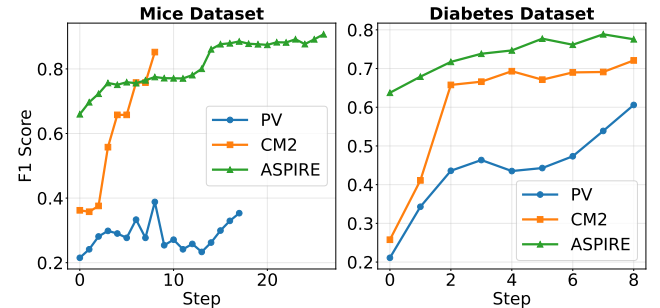

Figure 7: F1 scores at each feature acquisition step. PV indicates Partial VAE in EDDI.

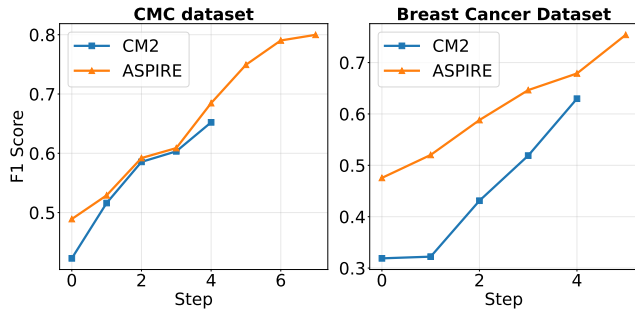

Figure 8: F1 scores at each feature acquisition step. PV indicates Partial VAE in EDDI.

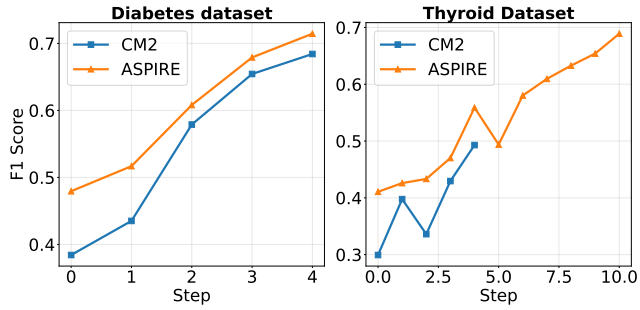

Figure 9: F1 scores at each feature acquisition step. PV indicates Partial VAE in EDDI.

| Dataset      | MLP   | XGB   | CM2    | ASP.(0) | ASP.(5)      |
|--------------|-------|-------|--------|---------|--------------|
| Diabetes     | 0.727 | 0.751 | 0.6963 | 0.84    | 0.8545       |
| Vehicle      | 0.85  | 0.913 | 0.588  | 0.853   | 0.894        |
| Satimage     | 0.80  | 0.89  | 0.8853 | 0.89    | 0.930        |
| Sick         | 0.55  | 0.914 | 0.9357 | 0.8922  | 0.950        |
| Pc1          | 0.476 | 0.624 | 0.8158 | 0.90    | 0.930        |
| Adult        | 0.86  | 0.798 | 0.911  | 0.899   | 0.945        |
| Breast       | 0.955 | 0.942 | 0.930  | 0.9416  | 0.966        |
| Cmc          | 0.67  | 0.65  | 0.7265 | 0.80    | 0.830        |
| PW           | 0.948 | 0.966 | 0.9912 | 0.878   | 0.930        |
| Cylinder     | 0.532 | 0.734 | 0.8138 | 0.81    | 0.8829       |
| MiceProtein  | 0.995 | 0.99  | 0.98   | 0.965   | 0.999        |
| Car          | 0.85  | 0.93  | 0.99   | 0.967   | 0.99         |
| Segment      | 0.97  | 0.99  | 0.9934 | 0.975   | 0.9621       |
| Porto-seguro | 0.49  | 0.49  | 0.725  | 0.88    | 0.8923       |
| Amazon       | 0.87  | 0.483 | 0.97   | 0.7832  | 0.8756       |
| Average      | 0.77  | 0.80  | 0.863  | 0.88    | <b>0.922</b> |

Table 5: Fine-tuning and model performance comparison with additional zero-shot support examples model.

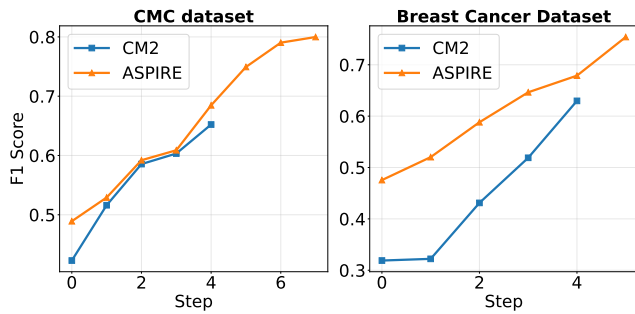

Figure 10: F1 scores at each feature acquisition step. PV indicates Partial VAE in EDDI.
